# Supplementary material for: The future of breast cancer screening: what do participants in a breast cancer screening program think about automation using artificial intelligence?
Source: PubMed Central journal article supplement — Acta Radiol Open. 2019 Dec 4;8(12):2058460119880315. doi: 10.1177/2058460119880315 (PMC6901736; doi:10.1177/2058460119880315), 2019-12-04
Supplement: ARR880315_Supplemental_Material.pdf [file ARR880315_Supplemental_Material.pdf]

**A. The standardized final mammography report letter with addition of invitation to partake in study. In Swedish, followed by a translation.**

NAMN  
ADRESS  
PERSONNUMMER

**Undersökningen av Dina bröst visade inga tecken på Cancer !**

Undersökningen utförd den DATUM

Är du mellan 40-74 år kommer en ny inbjudan om ca 24 månader.  
En tumör kan uppstå snabbt så vi råder Dig att själv regelbundet undersöka Dina bröst. Om Du upptäcker något avvikande tveka inte att söka läkare!  
Oftast är en knöl i bröstet godartad men om det är fråga om cancer innebär tidig upptäckt största möjligheten till att bli botad.

Med vänlig hälsning,

Mammografiavdelningen xxx sjukhuset

**Vill du vara med och påverka framtidens screening?**

I samarbete med Mammografiavdelningen genomförs för närvarande en enkätundersökning med frågor som rör framtidens screening. Gå in på följande länk i din telefon eller på en dator för att delta: xxx

DATUM FÖR UTSKRIFT

NAME  
ADDRESS  
PATIENT ID NUMBER

**The examination of Your breast showed no signs of Cancer !**

Examination performed on DATE

If you are between 40-74 years old, you will receive a new invitation in about 24 months.

A tumor may occur fast so we advice You to regularly examin Your breast. If you notice anything out of the ordinary do not hesitate to contact a doctor!

Most of the time a lump in the breast is benign but when it is a cancer, an early detection means the chances of being cured are the greatest.

With regards,

The Mammography Department, xxx Hostipal

**Would you like to influence how screening is done in the future?**

A survey concerning the screening of the future is currently being conducted in cooperation with the Mammography Department. Enter the following URL on your phone or a computer in order to participate: xxx

DATE OF PRINTING

## **B. The questionnaire, in Swedish, followed by a translated version.**

### **Datoriserad tolkning av mammografi**

#### Bakgrund

Mammografiscreening är en metod för att hitta tidig och botbar bröstcancer hos kvinnor som inte har några symtom från bröstet. I Stockholms län kallas alla kvinnor som är mellan 40 och 74 år till screeningundersökning vartannat år. Efter bildtagning bedöms mammografierna av minst två specialitläkare som tillsammans beslutar vilka kvinnor som skall kallas åter för ytterligare undersökning. Om allt ser normalt ut kommer ett brev efter två till tre veckor med svar att dina bröst är friska.

#### Varför görs denna studie?

Målet med denna studie är att kartlägga inställning till en automatiserad datoriserad bedömning av mammografier bland de kvinnor som deltar i mammografiscreening. Enkäten är en viktig del i arbetet med att utveckla framtidens mammografiscreening. Studien består i sin helhet av denna enkät. Enkäten handlar om din inställning till automatiserad bedömning av mammografier men ställer även några frågor om dig som svarar på enkäten. Enkäten bör ta cirka tio minuter att besvara.

#### Hur kommer dina svar att hanteras?

Din medverkan är frivillig, utan ersättning och du har full rätt att avstå. Vårdpersonal som du möter i framtiden kommer inte att veta om eller vad du har svarat, och din vård kommer inte att påverkas av om du deltar i denna studie eller ej. Dina svar och dina resultat kommer att behandlas så att inte obehöriga kan ta del av dem. Informationen som inhämtas kan inte knytas till dig personligen och kommer inte att användas till något annat än denna vetenskapliga undersökning. Ambitionen är att resultaten från denna studie skall publiceras i en allmänt tillgänglig vetenskaplig tidskrift. Du har rätt att begära ut ett registerutdrag för att se vilka uppgifter som finns registrerade om dig, men eftersom vi inte vet vem som skickat in vilka svar kommer vi inte kunna skicka ut några specifika uppgifter eller svar.

I enlighet med personuppgiftslagen (PUL) har du dock rätt att, upp till en gång per år och kostnadsfritt, få kännedom om vilka uppgifter som finns registrerade för dig samt, vid behov, begära rättelse. Du kan då vända dig till xxx: xxx, xxx Sjukhuset, xxx.

**Telefon:** xxx eller via sjukhusets växel xxx.

Om du har ytterligare frågor är du välkommen att i första hand skicka e-post till mig personligen (xxx@xxx) så återkommer jag så fort jag kan.

---

---

### Inställning till ny teknik

---

1. Vad är din inställning till nya IT-verktyg till exempel internetbank, sociala medier, appar på telefoner?

|         |   |   |         |
|---------|---|---|---------|
| 1       | 2 | 3 | 4       |
| Negativ |   |   | Positiv |

---

2. Hur insatt är du i den senaste tekniska utvecklingen av datorer, mobiltelefoner och internet?

|      |   |   |        |
|------|---|---|--------|
| 1    | 2 | 3 | 4      |
| Lite |   |   | Mycket |

---

---

### Så här kan det bli i framtiden

---

Nedan följer beskrivning av en tänkbar framtida utveckling och frågor som rör din inställning till denna utveckling. Frågorna rör tre olika scenarier som vi ber dig ta ställning till.

**Du har precis gjort din mammografiundersökning. Tänk dig nu att en dator kan bedöma dina mammografibilder och att du omedelbart efter undersökningen får nedanstående besked (till exempel i form av ett SMS eller via en dator på mottagningen):**

**Scenario 1 - BESKED: "Mammografibilder analyseras numera av en dator istället för av en läkare. Datorn hittar inget avvikande i dina bröst"**

3. Hur nöjd skulle du vara med detta svar?

|          |   |   |      |
|----------|---|---|------|
| 1        | 2 | 3 | 4    |
| Missnöjd |   |   | Nöjd |

---

4. Hur säker skulle du vara på att dina bröst är friska?

|        |   |   |       |
|--------|---|---|-------|
| 1      | 2 | 3 | 4     |
| Osäker |   |   | Säker |

**Scenario 2 - FÖRSTA BESKED: "En dator har bedömt dina mammografier. Dessa skall även bedömas av läkare. Om du har möjlighet att sitta ned och vänta på slutligt besked i upp till två timmar säg till i receptionen. I annat fall får du besked som vanligt inom 2-3 veckor."**

5. Hur nöjd skulle du vara med detta svar?

|   |   |   |   |
|---|---|---|---|
| 1 | 2 | 3 | 4 |
|---|---|---|---|

**Missnöjd**

**Nöjd**

---

6. Hur länge skulle du som mest vänta kvar istället för att gå hem och vänta på svar inom 2-3 veckor?

- |                                                            |                                            |
|------------------------------------------------------------|--------------------------------------------|
| <input type="checkbox"/> <b>Jag skulle inte vänta kvar</b> | <input type="checkbox"/> <b>30 minuter</b> |
| <input type="checkbox"/> <b>1 timme</b>                    | <input type="checkbox"/> <b>2 timmar</b>   |
| <input type="checkbox"/> <b>3 timmar</b>                   |                                            |

---

Scenario 2 - SLUTLIGT BESKED: "Dina bilder är nu granskade även av läkare. Dina bröst ser normala ut."

7. Hur säker skulle du vara på att dina bröst är friska?

|               |          |          |              |
|---------------|----------|----------|--------------|
| <b>1</b>      | <b>2</b> | <b>3</b> | <b>4</b>     |
| <b>Osäker</b> |          |          | <b>Säker</b> |

---

8. Givet att datorns bedömning som är minst lika bra som en genomsnittlig läkares bedömning. Vilket av nedanstående alternativ föredrar du?

- ALT 1 Endast dator bedömer bilderna (men ingen läkare)**
- ALT 2 Två läkare bedömer bilderna (men ingen dator)**

---

---

### Framtida utveckling - Hur ofta görs undersökningen

---

---

Föreställ dig att en dator används för att utifrån din senaste mammografiundersökning bedöma hur stor din risk för att utveckla bröstcancer är; låg risk, medel risk eller hög risk.

Gruppen med låg risk blir kallad för mammografiundersökning var 4:e år, de med normal risk vartannat år och de med hög risk undersöks varje år.

9. Vad anser du om denna möjlighet?

|               |          |          |            |
|---------------|----------|----------|------------|
| <b>1</b>      | <b>2</b> | <b>3</b> | <b>4</b>   |
| <b>Dåligt</b> |          |          | <b>Bra</b> |

---

---

10. Hur mycket skulle du lita på en riskbedömning gjord av en dator?

|                  |          |          |             |
|------------------|----------|----------|-------------|
| <b>1</b>         | <b>2</b> | <b>3</b> | <b>4</b>    |
| <b>Inte alls</b> |          |          | <b>Helt</b> |

---

---

11. Om du skulle bedömas ha hög risk och behöver undersökas varje år, vad tycker du då?

|               |          |          |            |
|---------------|----------|----------|------------|
| <b>1</b>      | <b>2</b> | <b>3</b> | <b>4</b>   |
| <b>Dåligt</b> |          |          | <b>Bra</b> |

---

---

12. Om du istället bedöms ha låg risk att utveckla cancer och istället undersöks var 4:e år, vad tycker du då?

|               |          |          |            |
|---------------|----------|----------|------------|
| <b>1</b>      | <b>2</b> | <b>3</b> | <b>4</b>   |
| <b>Dåligt</b> |          |          | <b>Bra</b> |

## Framtida utveckling - Tillägg av magnetkamera

Tänk dig en utveckling där en dator bedömer vilka kvinnor som får göra en extra undersökning med magnetkamera som är en mer omfattande undersökning.

13. Vad anser du om denna möjlighet?

|               |          |          |            |
|---------------|----------|----------|------------|
| <b>1</b>      | <b>2</b> | <b>3</b> | <b>4</b>   |
| <b>Dåligt</b> |          |          | <b>Bra</b> |

---

14. Hur väl skulle du lita på datorns bedömning?

|                  |          |          |                   |
|------------------|----------|----------|-------------------|
| <b>1</b>         | <b>2</b> | <b>3</b> | <b>4</b>          |
| <b>Inte alls</b> |          |          | <b>Mycket väl</b> |

---

15. Om du bedöms ha HÖG risk och kallas för magnetkameraundersökning, vad tycker du då?

|               |          |          |            |
|---------------|----------|----------|------------|
| <b>1</b>      | <b>2</b> | <b>3</b> | <b>4</b>   |
| <b>Dåligt</b> |          |          | <b>Bra</b> |

---

16. Om du bedöms ha LÅG risk och INTE skulle kallas för magnetkameraundersökning, vad tycker du då?

|               |          |          |            |
|---------------|----------|----------|------------|
| <b>1</b>      | <b>2</b> | <b>3</b> | <b>4</b>   |
| <b>Dåligt</b> |          |          | <b>Bra</b> |

---

---

### Om dig själv

---

17. Hur gammal är du?

- 40-44 år       45-49 år       50-54 år       55-59 år  
 60-64 år       65-69 år       70-74 år       äldre än 74 år

---

18. Var bor du?

- I en storstadsregion (med mer än 100 000 invånare)  
 I mindre stad/glesbygd (med mindre än 100 000 invånare)

---

19. Hur bor du?

- I eget hushåll/själv       Sambo/Gift  
 Med annan nära anhörig       På annat sätt

---

20. Vilken är din högsta utbildning som du har avslutat?

- Har inte avslutat grundskola  
 Har avslutat grundskola/folkskola (ca 9 års studier)  
 Har avslutat gymnasium/folkhögskola (motsvarande ca 12 års studier)  
 Har avslutat universitets- eller högskolestudier

---

21. Vad är din huvudsakliga sysselsättning?

- Sjukskriven       Studerar       Arbetar  
 Arbetslös/arbetssökande       Sjukpensionär       Pensionär  
 Arbetande pensionär       Annan, ej listad sysselsättning

---

22. Vad är din inkomst?

- Min inkomst är lägre än 27 500 kr/månad  
 Min inkomst är högre än 27 499 kr/månad



---

---

### Bakgrund om sjukdom

---

23. Har du haft någon form av cancersjukdom tidigare?

- Ja, bröstcancer**                       **Ja, annan cancer**                       **Nej**

---

24. Om du svarat ja ovan, för hur länge sedan konstaterades din cancersjukdom?

- Mer än 5 år sedan**                       **Mer än 10 år sedan**

---

25. Har någon i din närmaste familj (förälder, barn, partner, syskon) diagnostiserats med bröstcancer?

- Ja**                                               **Nej**

---

26. Har du någon kronisk sjukdom (diabetes, högt blodtryck, reumatism etc)?

- Ja, haft det mer än 10 år**  
 **Ja, haft mindre än 10 år**  
 **Nej**

---

27. Har du genomfört mammografiundersökning de senaste två åren (utöver den som du gjort alldeles nyligen)?

- Ja**                                               **Nej**

---

28. Vid vilket sjukhus undersöktes du idag?

- xxx**                                               **xxx**  
 **xxx**                                               **annat: \_\_\_\_\_**

Tack för din medverkan! / xxx xxx

# Computerized interpretation of mammography

## Background

Mammographic screening is a method to detect early and curable breast cancer in women without symptoms from their breast. In Stockholm County all women between 40 and 74 years of age are invited to partake in screening every other year. After the examination at least two specialist physicians interpret the images and together they determine what women should be recalled for additional examinations. If everything looks normal a letter will be sent out within two to three weeks reporting that your breast look healthy.

## Why is this study done?

The aim of this study is to determine attitudes to automated computerized interpretations of mammograms amongst the women who partake in the breast cancer screening program. The survey is an important part of developing the screening program of the future. This survey composes the entirety of the study. The survey is about your attitude to automation but it will also ask a few personal questions about you. The questionnaire should take about ten minutes to complete.

## How will your answers be handled? Hur kommer dina svar att hanteras?

Your participation is entirely optional, and you will not receive any compensation for you cooperation. No medical staff that you may encounter will know of your participation or what you may answer and your medical treatment will not be affected in any way by your participation. Your responses will be treated in such a way that no unauthorized person may take part in them. The information we collect cannot be attributed to you personally and will not be used in any other way than in this scientific study. The ambition is that results from this study are to be published in a publically available scientific journal. You have the right to ask for a log of what information we have stored about you, but since we cannot determine what participant sent what information we will not be able to provide any specific information.

In accordance to the Data Protection Act (PUL) however, you have a right to once yearly and with out cost request information on what information is stored about you and also request correction if need be. Such a request should be directed to xxx, at xxx Hospital, address.

**Telephone:** xxx or via the hospital switch board at xxx.

If you have addition questions you are welcome to contact med personally via e-mail (xxx@xxx) and I will get back to you as soon as I can.

---



---

**Attitude to new technology**

---

1. What is your attitude to new technology, such as online banking and social media?

|                 |   |   |                 |
|-----------------|---|---|-----------------|
| 1               | 2 | 3 | 4               |
| <b>Negative</b> |   |   | <b>Positive</b> |

---



---

2. What is your understanding of new technology such as computers, mobile phones and the internet?

|            |   |   |             |
|------------|---|---|-------------|
| 1          | 2 | 3 | 4           |
| <b>Low</b> |   |   | <b>High</b> |

---



---

**This may be the future**

---

Below you will find a possible future development and questions regarding your attitude to this development. The questions revolve around three different scenarios.

**You just did your mammography examination. Now imagine that a computer can assess your mammography images and that you immediately receive the message below (for example in the form of an SMS or via a computer in the reception):**

**Scenario 1 - MESSAGE: "Mammography images are now analyzed by a computer rather than by a doctor. The computer cannot not find any abnormalities in your breasts"**

3. How pleased would you be with this result?

|                     |   |   |                |
|---------------------|---|---|----------------|
| 1                   | 2 | 3 | 4              |
| <b>Dissatisfied</b> |   |   | <b>Pleased</b> |

---



---

4. How certain would you be that your breasts were healthy?

|                  |   |   |                |
|------------------|---|---|----------------|
| 1                | 2 | 3 | 4              |
| <b>Uncertain</b> |   |   | <b>Certain</b> |

**Scenario 2 - FIRST MESSAGE: "A computer has assessed your mammograms. A physician will also assess them. If you have the possibility to sit down and wait for a final report, for up to two hours, please tell our personnel in the reception. Otherwise you will be notified as usual within 2-3 weeks."**

5. How pleased would you be with this message?

|                   |   |   |                |
|-------------------|---|---|----------------|
| 1                 | 2 | 3 | 4              |
| <b>Disstified</b> |   |   | <b>Pleased</b> |

---

6. For how long would you be willing wait at most for a final report, as opposed to going home and receiving the report within 2-3 weeks?

- I would not wait
- 30 minutes
- 1 hour
- 2 hours
- 3 hours

---

**Scenario 2 - FINAL MESSAGE: "Your images have been examined by a physician now. Your breasts look normal."**

7. How confident would you be that your breast are healthy?

- |                  |          |          |                |
|------------------|----------|----------|----------------|
| <b>1</b>         | <b>2</b> | <b>3</b> | <b>4</b>       |
| <b>Uncertain</b> |          |          | <b>Certain</b> |

---

8. Given the computer is at least as good as the average physician, what would you prefer?

- ALTERNATIVE 1 Only a computer interprets the images (but no physician)**
- ALTERNATIVE 2 Two physicians interpret the images (but no computer)**

---

**Future development - How often the exam is done**

---

**Imagine that a computer is used to assess, based on your latest mammography examination, how great your risk of developing breast cancer is; low risk, medium risk or high risk.**

**The low-risk group is called for mammography examination every four years, those with normal risk every other year and those with high risk are examined every year.**

9. What do you think about this possibility?

**1                  2                  3                  4**  
**Bad                                  Good**

---

10. How well would you trust a computer to determine frequency of screening mammograms?

**1                  2                  3                  4**  
**Not at all                                  Entirely**

---

11. What would you think if you are determined at high risk of developing cancer and you are offered screening annually?

**1                  2                  3                  4**  
**Bad                                  Good**

---

12. What would you think if you in stead are determined at low risk of developing cancer and you are offered screening every 4<sup>th</sup> year?

**1                  2                  3                  4**  
**Bad                                  Good**

## Future development - Addition of magnetic resonance imaging

Imagine a development where a computer determines which women should be offered the addition of a magnetic resonance imaging (MRI), which is a more extensive examination.

13. What do you think about this possibility?

|            |          |          |             |
|------------|----------|----------|-------------|
| <b>1</b>   | <b>2</b> | <b>3</b> | <b>4</b>    |
| <b>Bad</b> |          |          | <b>Good</b> |

---

14. How well would you trust computer to determine this?

|                   |          |          |                 |
|-------------------|----------|----------|-----------------|
| <b>1</b>          | <b>2</b> | <b>3</b> | <b>4</b>        |
| <b>Not at all</b> |          |          | <b>Entirely</b> |

---

15. What would you think if you are determined to have a HIGH risk and therefore offered an MRI?

|            |          |          |             |
|------------|----------|----------|-------------|
| <b>1</b>   | <b>2</b> | <b>3</b> | <b>4</b>    |
| <b>Bad</b> |          |          | <b>Good</b> |

---

16. What would you think if you are determined to have a LOW risk and NOT offered an MRI?

|            |          |          |             |
|------------|----------|----------|-------------|
| <b>1</b>   | <b>2</b> | <b>3</b> | <b>4</b>    |
| <b>Bad</b> |          |          | <b>Good</b> |

---

---

**About you**

---

---

17. How old are you?

- 40-44 years**       **45-49 years**       **50-54 years**       **55-59 years**  
 **60-64 years**       **65-69 years**       **70-74 years**       **more than 74 years**
- 
- 

18. Where do you live?

- In a metropolitan area (more than 100,000 inhabitants)**  
 **In a small town/rural areas (less than 100,000 inhabitants)**
- 
- 

19. What is your housing situation?

- By myself**                                       **With spouse or partner**  
 **With other close relative**               **Other**
- 
- 

20. What is the highest level of education that you have completed?

- I have not finished primary school**  
 **Primary school (about 9 years of studies)**  
 **High school or corresponding (about 12 years of studies)**  
 **University studies**
- 
- 

21. What is your primary occupation?

- On sick leave**                                       **Studying**                                       **Employed**  
 **Unemployed/looking for work**       **Early retired (due to disease)**                                       **Retired**  
 **Working retiree**                                       **Other not listed occupation**
- 
- 

22. What is your income?

- My income is lower than 27,500 kr per month**  
 **My income is higher than 27,499 kr per month**

---

---

**Background on disease**

---

---

23. Have you had any cancer diagnosis previously?

- Yes, breast cancer**                       **Yes, other cancer**                       **No**

---

---

24. If you answered yes above, how long ago was your cancer diagnosed?

- More than 5 years ago**                       **More than 10 years ago**

---

---

25. Has any one in your closest family (parents, children, partner, siblings) been diagnosed with breast cancer?

- Yes**                                               **No**

---

---

26. Do you have any chronic disease (diabetes, high blood pressure, rheumatism etc.)?

- Yes, for more than 10 years**  
 **Yes, for less than 10 years**  
 **No**

---

---

27. Have you had any additional mammography exams done in the past two years (apart from the one you recently went through)?

- Yes**                                               **No**

---

---

28. At what hospital were you examined?

- xxx Hospital**                       **xxx Hospital**  
 **xxx Hospital**                       **Other: \_\_\_\_\_**

Thank you for your participation! / xxx
